# Supplementary material for: The sol–gel transition of ultra-low solid content TEMPO-cellulose nanofibril/mixed-linkage β-glucan bionanocomposite gels
Source: Royal Society of Chemistry journal article supplement (doi:10.1039/c8sm01878b), 2018-01-01
Supplement: c8sm01878b1.pdf [file c8sm01878b1.pdf]

**Supporting Information for:**

**The sol-gel transition of ultra-low solid content TEMPO-cellulose nanofibril/mixed-linkage  $\beta$ -glucan bionanocomposite gels**

Suvi Arola<sup>1</sup>, Mahmoud Ansari<sup>2</sup>, Antti Oksanen<sup>3</sup>, Elias Retulainen<sup>3</sup>, Savvas Hatzikiriakos<sup>2</sup>,  
and Harry Brumer<sup>1,4,5,6,\*</sup>

<sup>1</sup>Michael Smith Laboratories, University of British Columbia, 2185 East Mall, Vancouver, BC, V6T 1Z4, Canada.

<sup>2</sup>Department of Chemical and Biological Engineering, University of British Columbia, 2360 East Mall, Vancouver, British Columbia, Canada

<sup>3</sup>VTT Technical Research Centre of Finland, Ltd., P.O. Box 1603, 40101 Jyväskylä, Finland

<sup>4</sup>Department of Chemistry, University of British Columbia, 2036 Main Mall, Vancouver, British Columbia V6T 1Z1, Canada.

<sup>5</sup>Department of Biochemistry and Molecular Biology, University of British Columbia, 2350 Health Sciences Mall, Vancouver, British Columbia V6T 1Z3, Canada.

<sup>6</sup>Department of Botany, University of British Columbia, 6270 University Blvd., Vancouver, British Columbia V6T 1Z4, Canada

\*To whom correspondence should be addressed: E\_mail [brumer@msl.ubc.ca](mailto:brumer@msl.ubc.ca); Tel. (+1) 6048273738; Fax (+1) 6048222114.

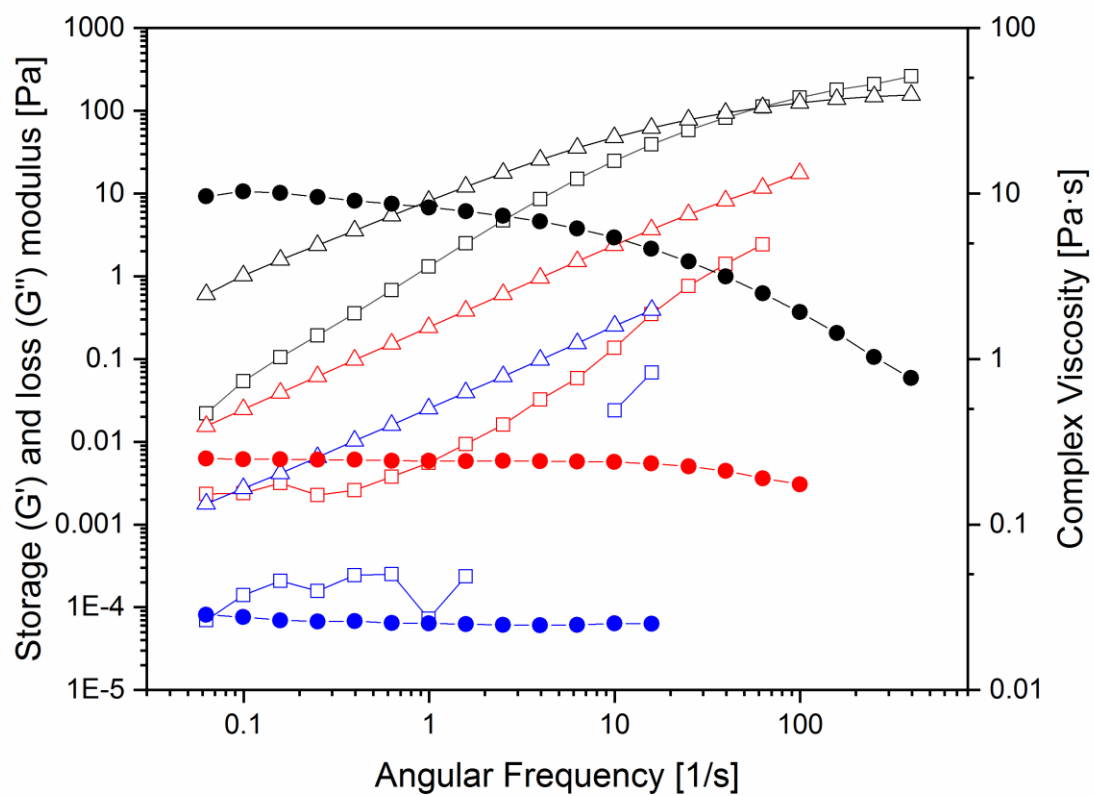

**Figure S1.** Modulus of neat MLG. Black symbols 20 g L<sup>-1</sup> MLG, red symbols 10 g L<sup>-1</sup> MLG, and blue symbols 5 g L<sup>-1</sup> MLG. Squares G', triangles G'', and circles complex viscosity.

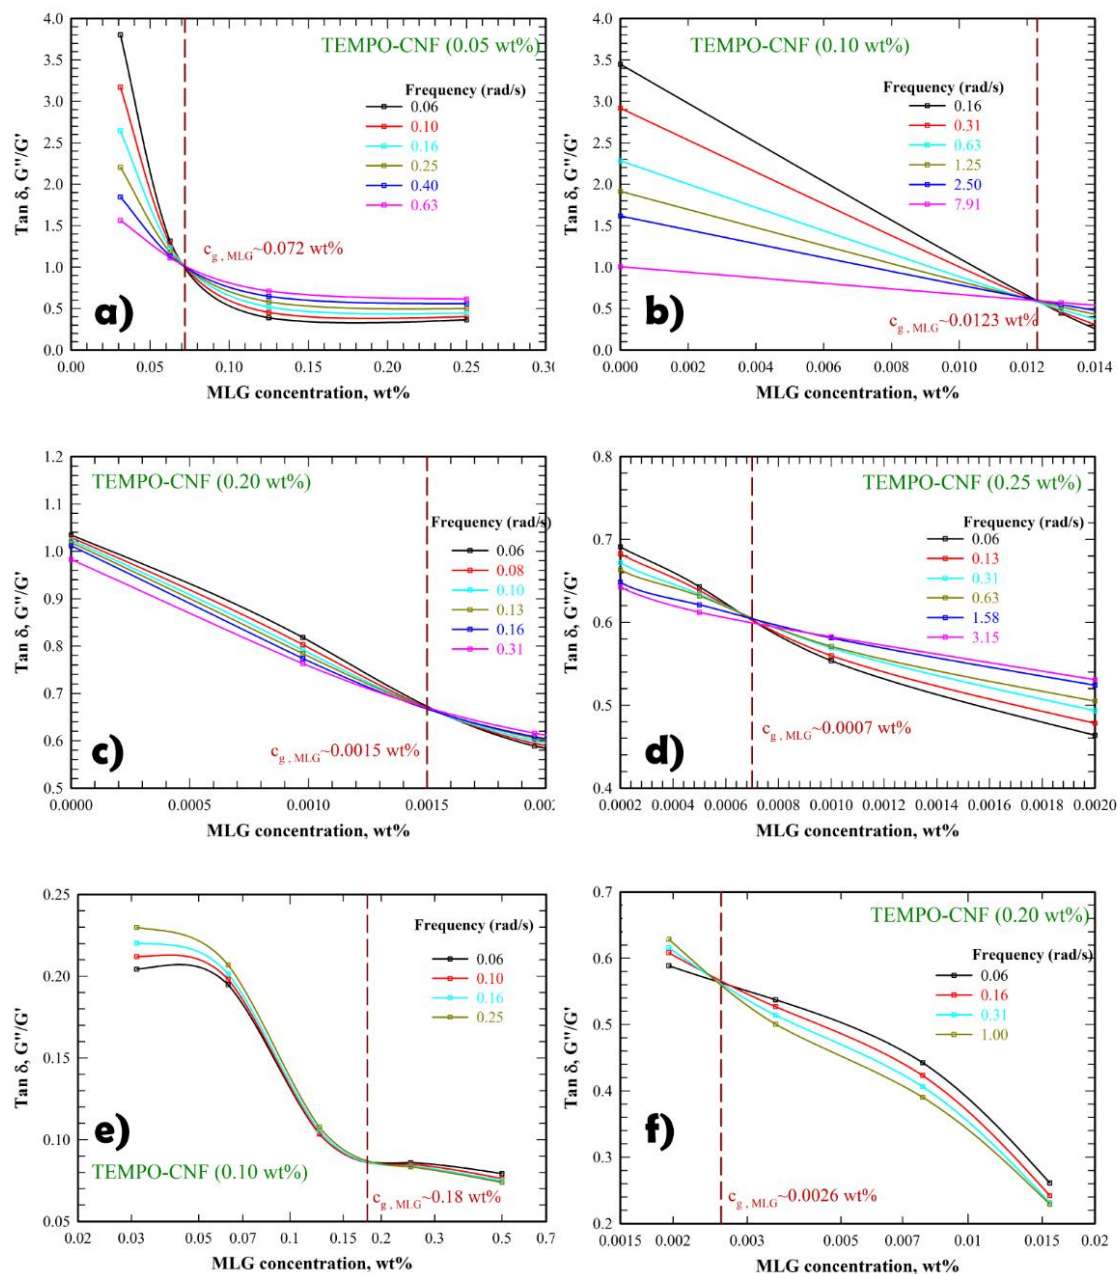

**Figure S2.** Sol-gel transitions for TEMPO-CNF/MLG systems as a function of MLG concentration (cf. Table 1). a) first transition with 0.05 % (w/v) TEMPO-CNF, b) first transition with 0.10 % (w/v) TEMPO-CNF, c) first transition with 0.20 % (w/v) TEMPO-CNF, d) first transition with 0.25 % (w/v) TEMPO-CNF, e) second transition with 0.10 % (w/v) TEMPO-CNF, and f) second transition with 0.20 % (w/v) TEMPO-CNF. Data for 0.15 % (w/v) TEMPO-CNF is shown in Figure 3. Lines between data points were generated by using spline interpolation in MATLAB.

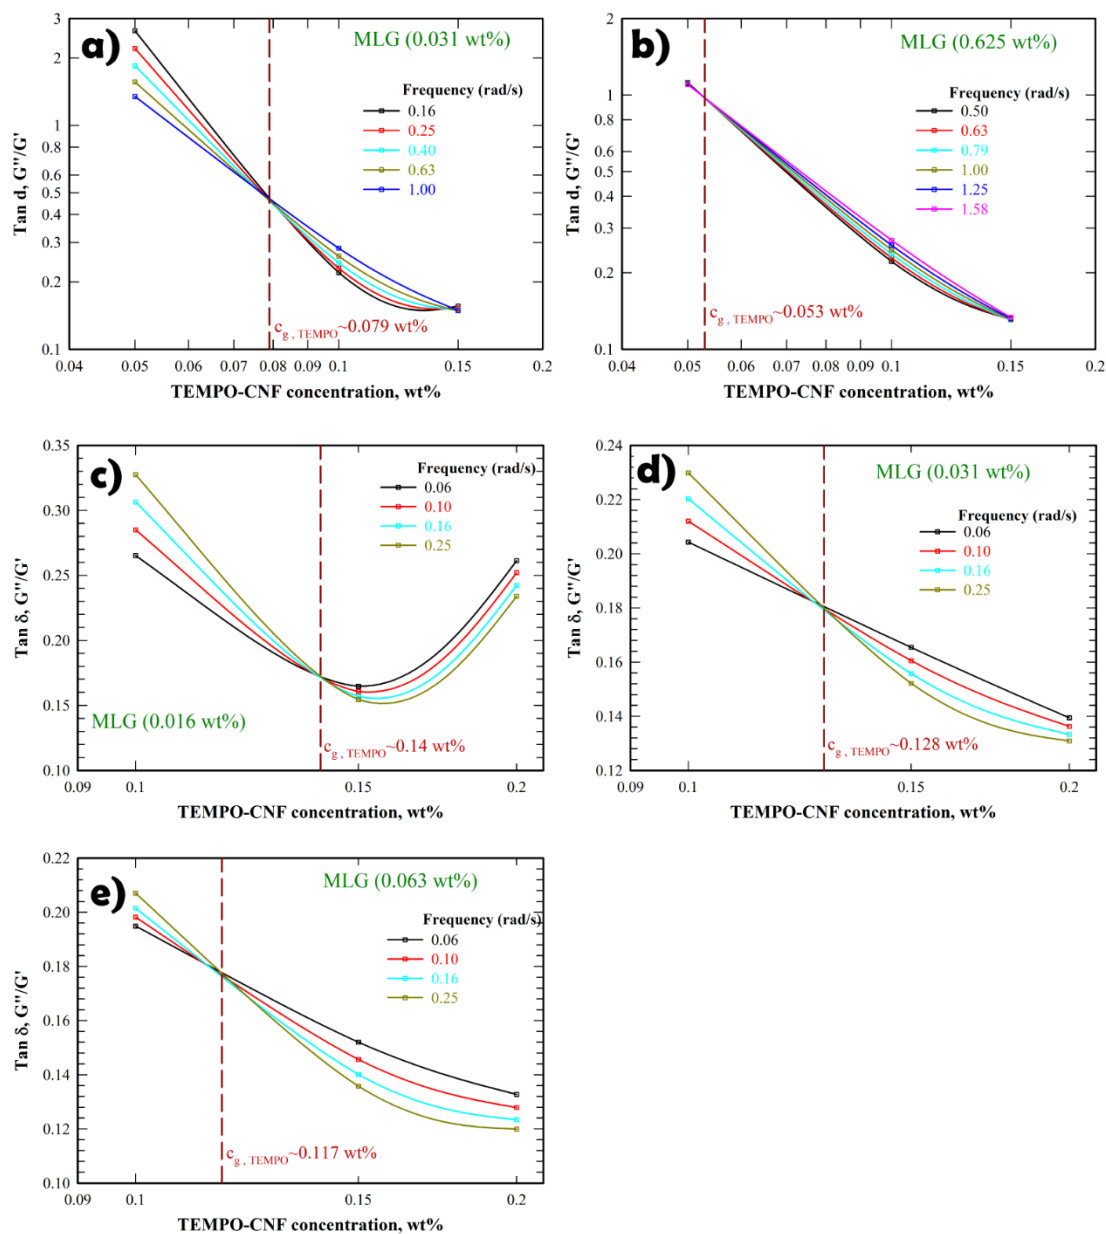

**Figure S3.** Sol-gel transitions for MLG/TEMPO-CNF systems as a function of TEMPO-CNF concentration (cf. Table 1). a) first transition with 0.031 % (w/v) MLG, b) first transition with 0.625 % (w/v) MLG, c) second transition with 0.016 % (w/v) MLG, d) second transition with 0.031 % (w/v) MLG, and e) second transition with 0.063 % (w/v) MLG. Data for 0.125 % (w/v) MLG is shown in Figure 4. Lines between data points were generated by using spline interpolation in MATLAB.

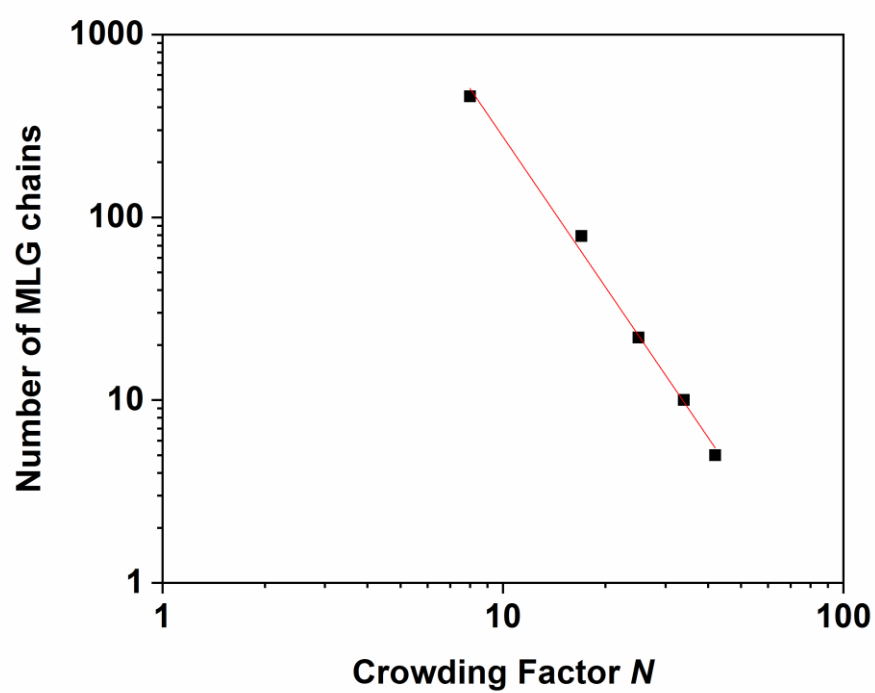

**Figure S4.** *Scaling of crowding factor,  $N$ , with the number of MLG chains. The slope of the linear fit is -2.73.*
